# Supplementary material
Source: Research Square preprint supplement (doi:10.21203/rs.3.rs-9628562/v1)
Supplement: Supplementary file 1 [file ee733b9c1686acc89ebf2f38.docx]

**AUTHOR RESPONSE SHEET**

Ref.:  Ms. No. **ESPR-D-26-03380**

Title:  **REACTION MECHANISM AND RATE CONSTANTS OF BENZOTHIOPHENE DESULFURIZATION: A DFT AND KINETIC MODELING STUDY**

**Editor query:**

Thank you for submitting your manuscript.

Unfortunately, and after a careful examination of your paper, I am sorry to inform you that your manuscript is not acceptable for a publication in ESPR in the present format.

Therefore, I must reject the manuscript as is, but I encourage you **to resubmit as a new manuscript** after the appropriate changes or research have been completed.

My reason in consideration for your paper is that self-citations are counted to a maximum of 5 for the whole bibliography, irrespective of the number of co-authors and as a cumulative limit across all co-authors, so please reduce them.

Furthermore, the bibliography needs to be re-checked. Please make sure that all references are complete, as per our guidelines.

Thank you for giving us the opportunity to consider your work.

**Author response:**

The authors thank editor for careful evaluation. As per editor suggestion, the self-citation has been reduced and re-checked all the bibliography as per the journal guidelines.

Hence, the authors kindly request editor to consider this manuscript for the possible publication in ***Environmental Science and Pollution Research.***
